# Supplementary material for: The first example of an asymmetrical μ-oxo bridged dinuclear iron complex with a terpyridine ligand
Source: Royal Society of Chemistry journal article supplement (doi:10.1039/c9nj02413a), 2019-01-01
Supplement: c9nj02413a1.pdf [file c9nj02413a1.pdf]

## ELECTRONIC SUPPORTING INFORMATION

### **First example of asymmetrical $\mu$ -oxo bridged dinuclear iron complex with terpyridine ligand: synthesis, crystal structure and electrochemical properties**

Aleksandra Bocian<sup>a</sup>, Sergiusz Napierała<sup>a,b</sup>, Adam Gorczyński<sup>a</sup>, Maciej Kubicki<sup>a</sup>, Monika Wałęsa-  
Chorab<sup>a,b\*</sup>, Violetta Patroniak<sup>a\*</sup>

<sup>a</sup>*Faculty of Chemistry, Adam Mickiewicz University, Uniwersytetu Poznańskiego 8, 61-614 Poznań,  
Poland.*

<sup>b</sup>*Centre for Advanced Technologies, Adam Mickiewicz University, Uniwersytetu Poznańskiego 10, 61-614  
Poznań, Poland.*

*\* corresponding authors: mchorab@amu.edu.pl, violapat@amu.edu.pl*

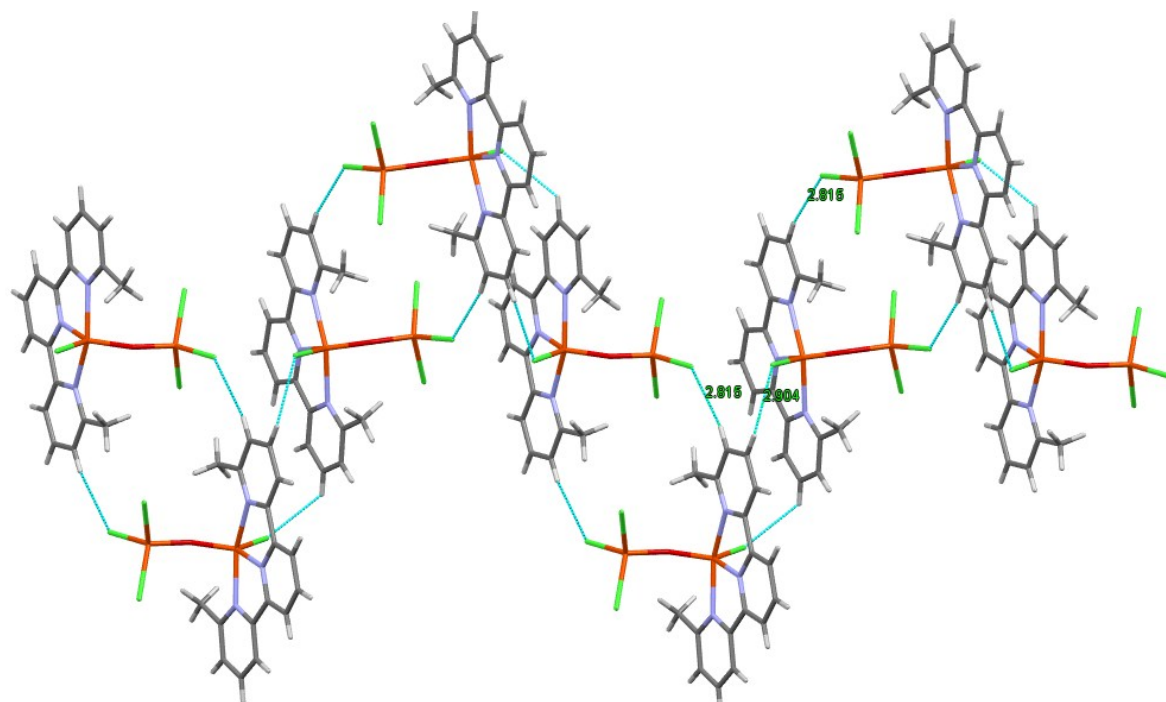

**Figure S1.** Short contacts in complex **1** that are vital for organization into 1-dimensional zig-zag chain structure.

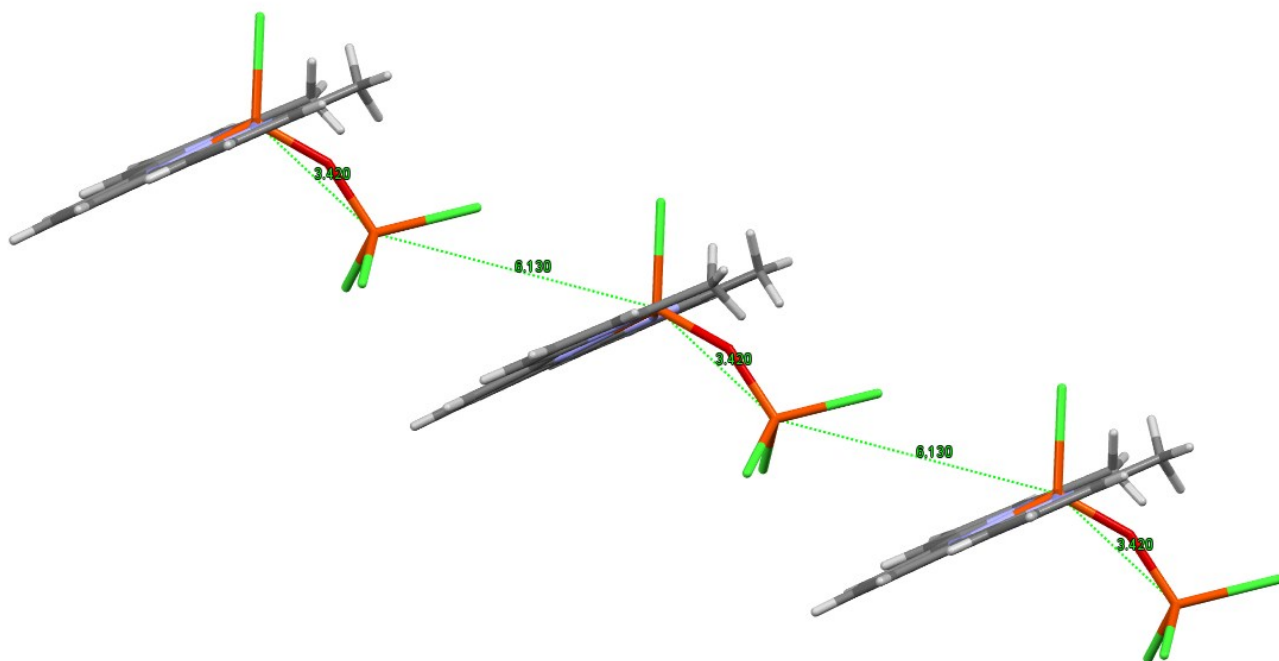

**Figure S2.** One-dimensional zig-zag chain structure in complex **1**. Short contacts to molecules responsible for organization were omitted for clarity, green lines represent intra- and intermetallic distances

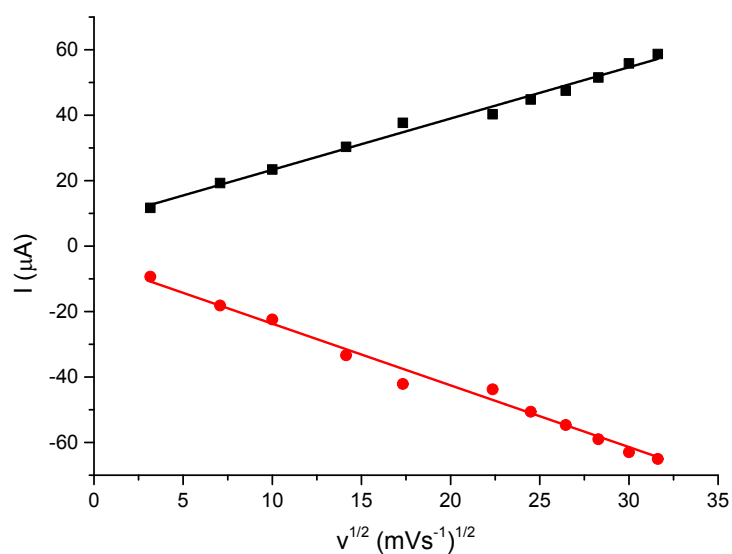

**Figure S3.** Linear relationship of the anode (■) and cathode (●) peak currents versus the square root of the scanning speed for the complex **2**.  $R^2 = 0.989$  and  $0.984$  for  $ip_a$  and  $ip_c$  respectively.

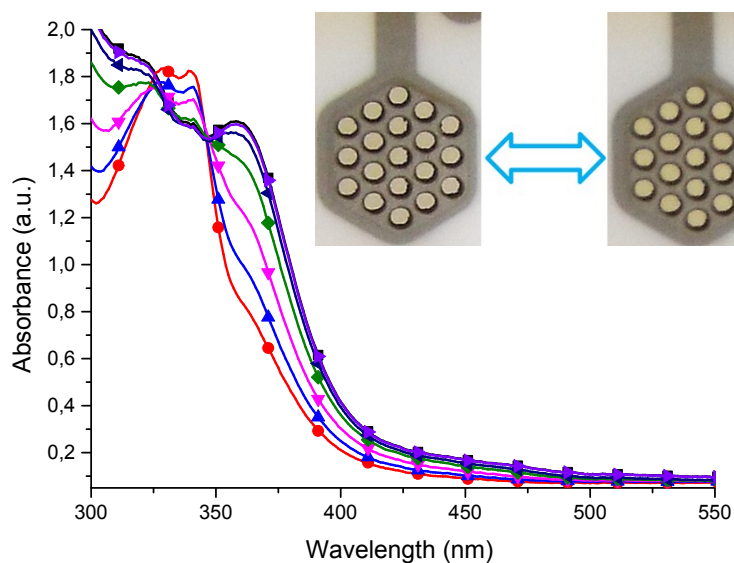

**Figure S4.** The spectroelectrochemical properties of complex **2** in 0.1M TBAClO<sub>4</sub> solution in acetonitrile as a supporting electrolyte by applying: no potential (■), +100 (●), +200 (▲), +300 (▼), +400 (◆), +500 (◄), and 600 (►) mV potentials versus Ag/AgCl gel reference electrode held for 30 s per potential. Insert: photographs of the Fe<sup>2+</sup> (left) and Fe<sup>3+</sup> (right) state of **2** by applying a potential for 1 min.

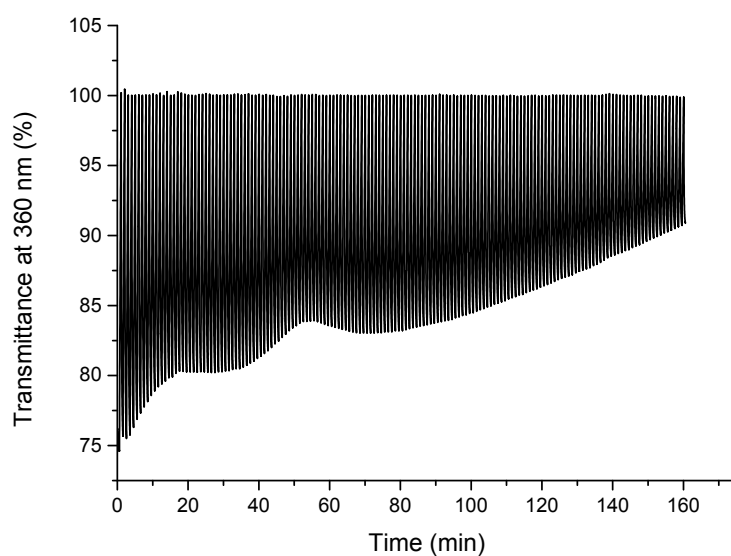

**Figure S5.** Changes in transmittance of complex **1** measured in anhydrous and deaerated acetonitrile with 0.1 M TBAClO<sub>4</sub> as a supporting electrolyte and monitored at 360 nm when switching between +100 mV and +600 mV potential at 60 s cycles.

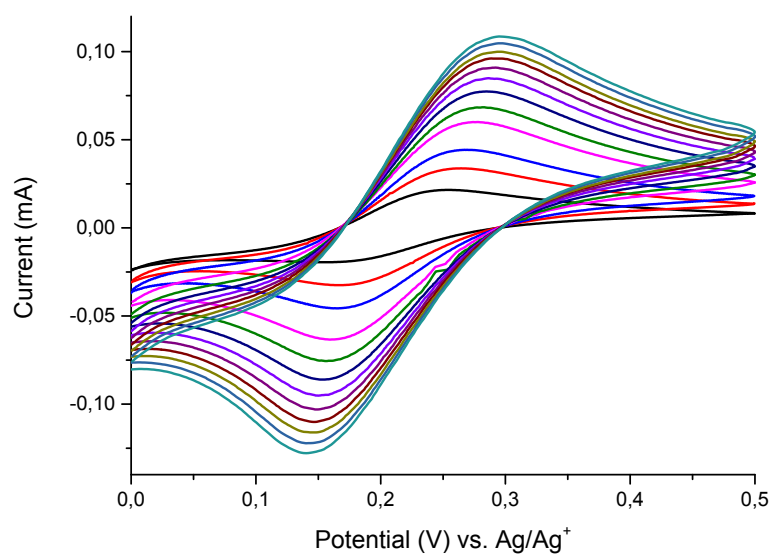

**Figure S6.** CVs of complex **1** measured in anhydrous and deaerated acetonitrile with 0.1 M TBAClO<sub>4</sub> as a supporting electrolyte at different scan rates.

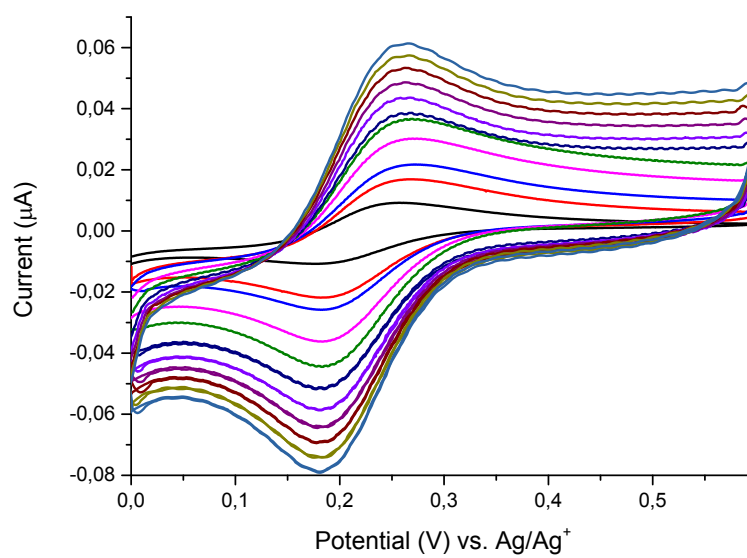

**Figure S7.** CVs of complex **2** measured in anhydrous and deaerated acetonitrile with 0.1 M TBAClO<sub>4</sub> as a supporting electrolyte at different scan rates.
